# Supplementary material
Source: Royal Society of Chemistry journal article supplement (doi:10.1039/d6cp01248e)
Supplement: d6cp01248e1.pdf [file d6cp01248e1.pdf]

**Electronic Supporting Information for**  
**Vibronic Coupling Effects in the Photoelectron Spectra of  $\text{LiB}_6^-$**

Rishabh Kumar Pandey\* and Bingyu Cui

*School of Science and Engineering, The Chinese University of Hong Kong (Shenzhen),  
Longgang, Shenzhen, Guangdong, 518172, P.R. China.*

---

\* rishabhp109@gmail.com

Table S.I. **Normal-mode combinations, primitive basis dimensions, and single-particle functions (SPFs) employed in uncoupled and coupled (TD and TI) MCTDH calculations for  $\text{LiB}_6^-$**

| Combination of normal modes                                       | Primitive basis | SPF                 |
|-------------------------------------------------------------------|-----------------|---------------------|
| $\nu_1$                                                           | 18              | [14,14,14,14,14,14] |
| $\nu_2$                                                           | 16              | [12,12,12,12,12,12] |
| $\nu_3$                                                           | 15              | [10,10,10,10,10,10] |
| $\nu_4$                                                           | 13              | [8,8,8,8,8,8]       |
| $\nu_5$                                                           | 10              | [6,6,6,6,6,6]       |
| $\nu_1, \nu_7, \nu_{11}$                                          | 18,18,18        | [14,14,14,14,14,14] |
| $\nu_2, \nu_8, \nu_9$                                             | 16,16,16        | [12,12,12,12,12,12] |
| $\nu_3, \nu_6, \nu_{12}$                                          | 15,15,15        | [10,10,10,10,10,10] |
| $\nu_4, \nu_{10}, \nu_{13}$                                       | 13,13,13        | [8,8,8,8,8,8]       |
| $\nu_5, \nu_{14}, \nu_{15}$                                       | 10,10,10        | [6,6,6,6,6,6]       |
| $\nu_1$                                                           | 18              |                     |
| $\nu_2$                                                           | 16              |                     |
| $\nu_3$                                                           | 15              |                     |
| $\nu_4$                                                           | 13              |                     |
| $\nu_5$                                                           | 10              |                     |
| $\nu_2, \nu_4, \nu_{15}$                                          | 4,4,4,4         |                     |
| $\nu_7, \nu_9, \nu_{11}, \nu_{14}$                                | 3,3,3,3         |                     |
| $\nu_1, \nu_3, \nu_5, \nu_6, \nu_8, \nu_{10}, \nu_{12}, \nu_{13}$ | 2,2,2,2,2,2,2,2 |                     |

Table S.II. **Higher-order terms concerning the non-totally symmetric modes of  $\text{LiB}_6^-$  involved in the model vibronic Hamiltonian**

| Mode        | $\gamma_i^{(j)}$ | $D_i^{(j)}$ | Mode        | $\gamma_i^{(j)}$ | $D_i^{(j)}$ |
|-------------|------------------|-------------|-------------|------------------|-------------|
| $\tilde{X}$ |                  |             | $\tilde{C}$ |                  |             |
| $\nu_6$     | -0.0473          | 0.0003      | $\nu_6$     | -0.0216          | 0.0000      |
| $\nu_7$     | -0.0085          | 0.0000      | $\nu_7$     | -0.0101          | 0.0000      |
| $\nu_8$     | -0.0022          | 0.0000      | $\nu_8$     | -0.0109          | 0.0000      |
| $\nu_9$     | -0.0098          | 0.0000      | $\nu_9$     | -0.3734          | 0.0838      |
| $\nu_{10}$  | 0.0004           | 0.0000      | $\nu_{10}$  | -0.6617          | 0.1626      |
| $\nu_{11}$  | -0.0026          | 0.0000      | $\nu_{11}$  | -0.8999          | 0.2670      |
| $\nu_{12}$  | -0.0037          | 0.0000      | $\nu_{12}$  | 0.0020           | 0.0000      |
| $\nu_{13}$  | 0.0025           | 0.0000      | $\nu_{13}$  | -0.0060          | 0.0000      |
| $\nu_{14}$  | 0.0037           | 0.0000      | $\nu_{14}$  | 0.0034           | 0.0000      |
| $\nu_{15}$  | -0.0115          | 0.0000      | $\nu_{15}$  | 0.0132           | 0.0000      |
| $\tilde{A}$ |                  |             | $\tilde{D}$ |                  |             |
| $\nu_6$     | -0.0275          | 0.0003      | $\nu_6$     | -0.0064          | 0.0000      |
| $\nu_7$     | -0.0206          | 0.0002      | $\nu_7$     | 0.0519           | -0.0004     |
| $\nu_8$     | -0.0016          | 0.0000      | $\nu_8$     | 0.0029           | 0.0000      |
| $\nu_9$     | -0.0095          | 0.0000      | $\nu_9$     | 0.0086           | 0.0000      |
| $\nu_{10}$  | -0.0038          | 0.0000      | $\nu_{10}$  | -0.0032          | 0.0000      |
| $\nu_{11}$  | -0.0002          | 0.0000      | $\nu_{11}$  | 0.0049           | 0.0000      |
| $\nu_{12}$  | 0.0011           | 0.0000      | $\nu_{12}$  | 0.0022           | 0.0000      |
| $\nu_{13}$  | 0.0072           | 0.0000      | $\nu_{13}$  | -0.0035          | 0.0000      |
| $\nu_{14}$  | 0.0010           | 0.0000      | $\nu_{14}$  | 0.0238           | -0.0002     |
| $\nu_{15}$  | -0.0148          | 0.0000      | $\nu_{15}$  | 0.0097           | 0.0000      |
| $\tilde{B}$ |                  |             | $\tilde{E}$ |                  |             |
| $\nu_6$     | 0.0673           | -0.0005     | $\nu_6$     | 0.00724          | -0.0002     |
| $\nu_7$     | 0.0238           | -0.0001     | $\nu_7$     | -0.0484          | 0.0004      |
| $\nu_8$     | 0.0077           | 0.0000      | $\nu_8$     | -0.0058          | 0.0000      |
| $\nu_9$     | 0.3082           | -0.0385     | $\nu_9$     | -0.0159          | 0.0000      |
| $\nu_{10}$  | 0.4787           | -0.0633     | $\nu_{10}$  | -0.0012          | 0.0000      |
| $\nu_{11}$  | 0.9169           | -0.2718     | $\nu_{11}$  | -0.0010          | 0.0000      |
| $\nu_{12}$  | -0.0031          | 0.0000      | $\nu_{12}$  | -0.0041          | 0.0000      |
| $\nu_{13}$  | -0.0242          | 0.0000      | $\nu_{13}$  | 0.0040           | 0.0000      |
| $\nu_{14}$  | -0.0630          | 0.0002      | $\nu_{14}$  | -0.0029          | 0.0000      |
| $\nu_{15}$  | -0.0105          | 0.0000      | $\nu_{15}$  | 0.0200           | 0.0000      |

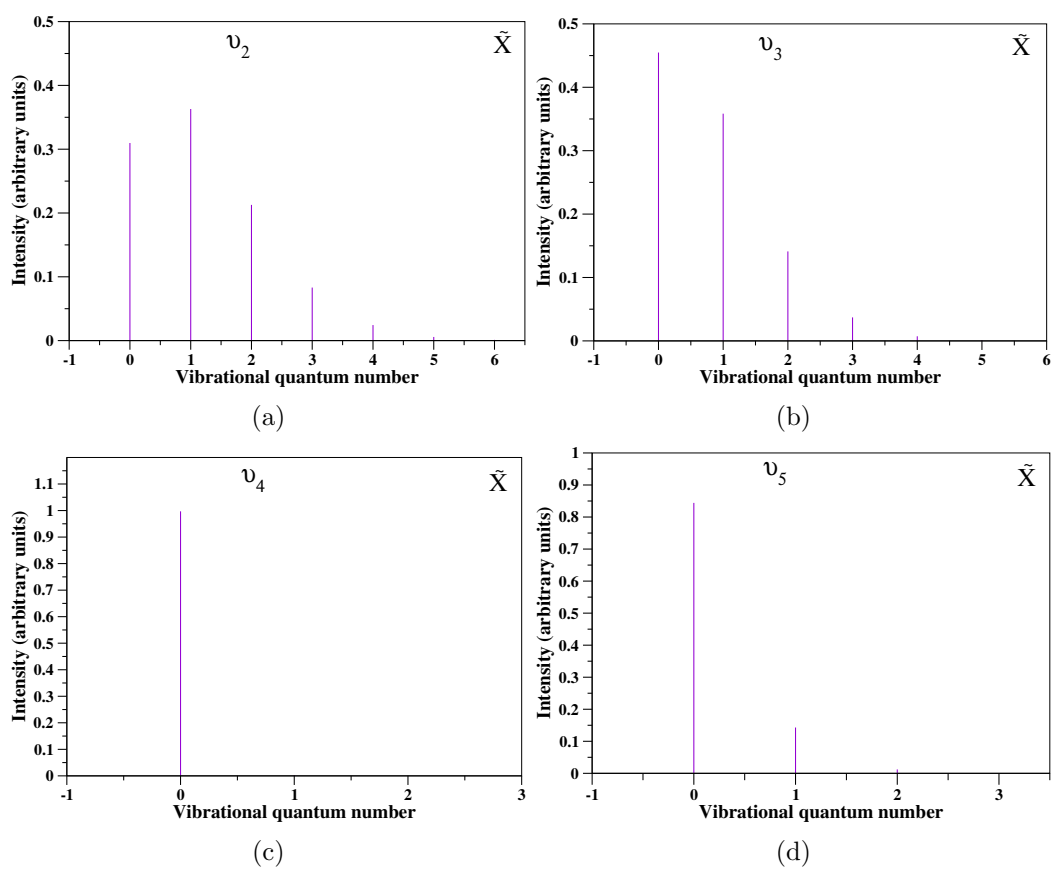

Figure S1. Poisson intensity distribution for totally symmetric modes concerning the  $\tilde{X}$  state of  $\text{LiB}_6$ .

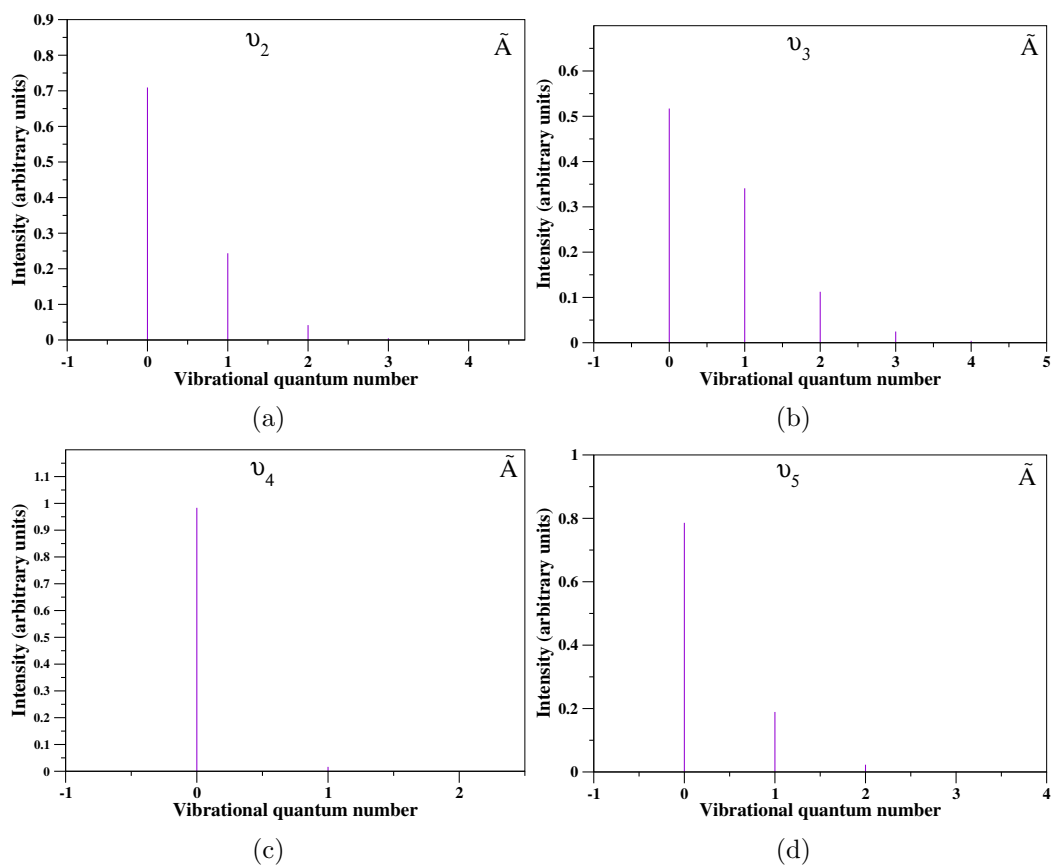

Figure S2. Poisson intensity distribution for totally symmetric modes concerning the  $\tilde{A}$  state of  $\text{LiB}_6$ .

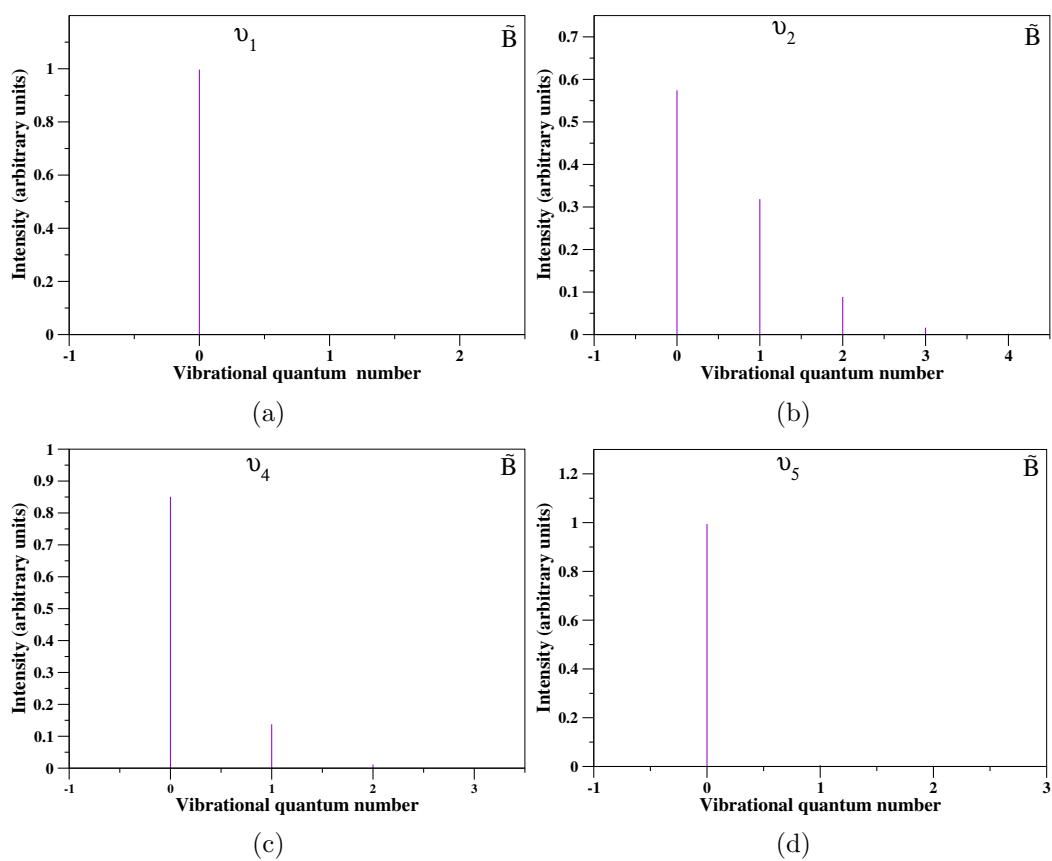

Figure S3. Poisson intensity distribution for totally symmetric modes concerning the  $\tilde{B}$  state of  $\text{LiB}_6$ .

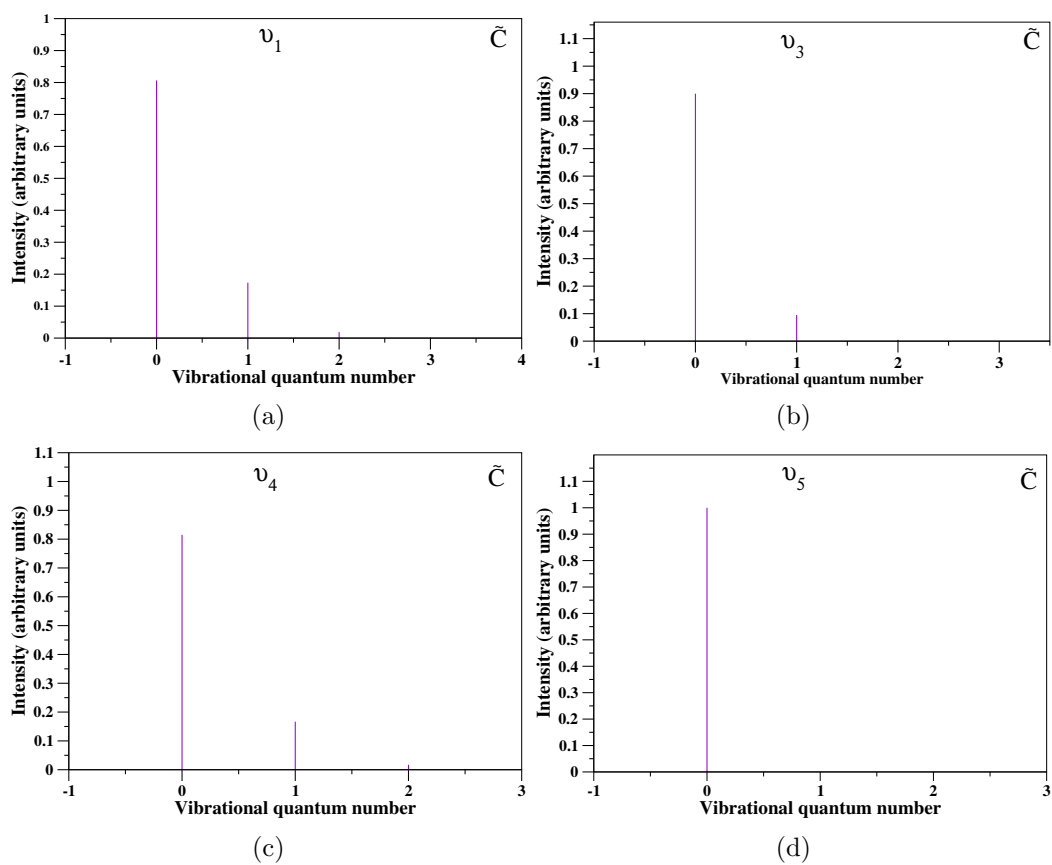

Figure S4. Poisson intensity distribution for totally symmetric modes concerning the  $\tilde{C}$  state of  $\text{LiB}_6$ .

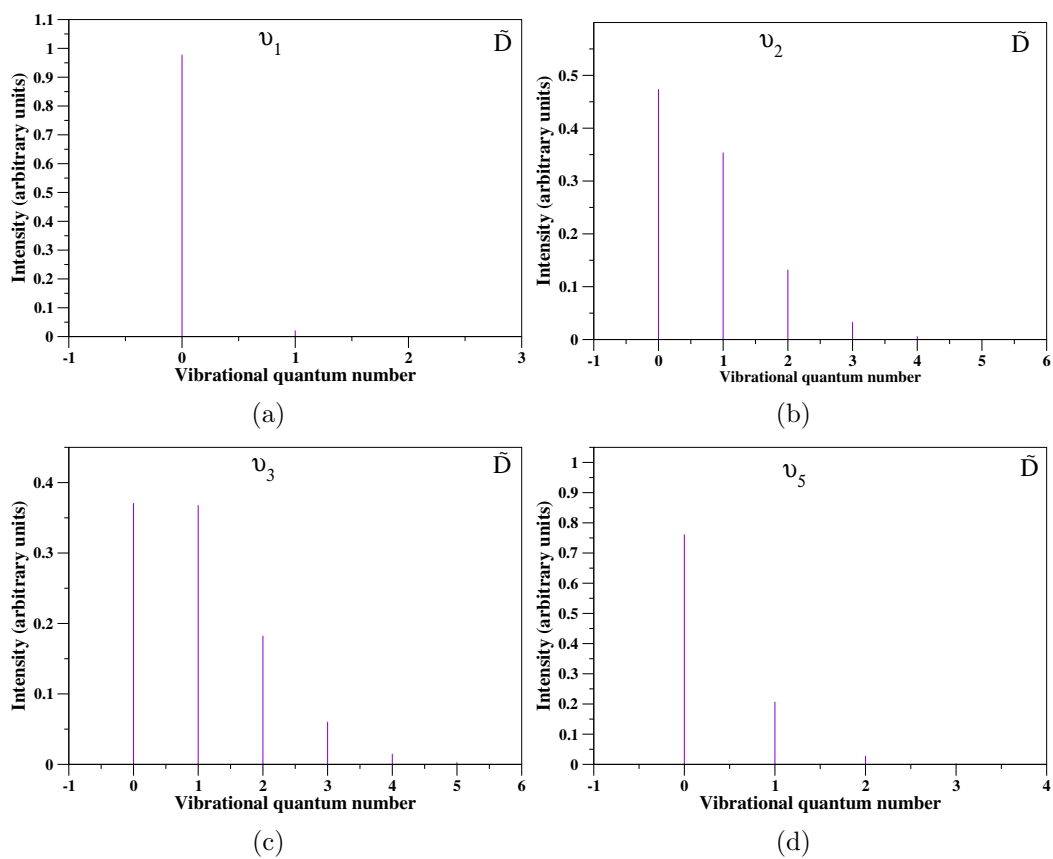

Figure S5. Poisson intensity distribution for totally symmetric modes concerning the  $\tilde{D}$  state of  $\text{LiB}_6$ .

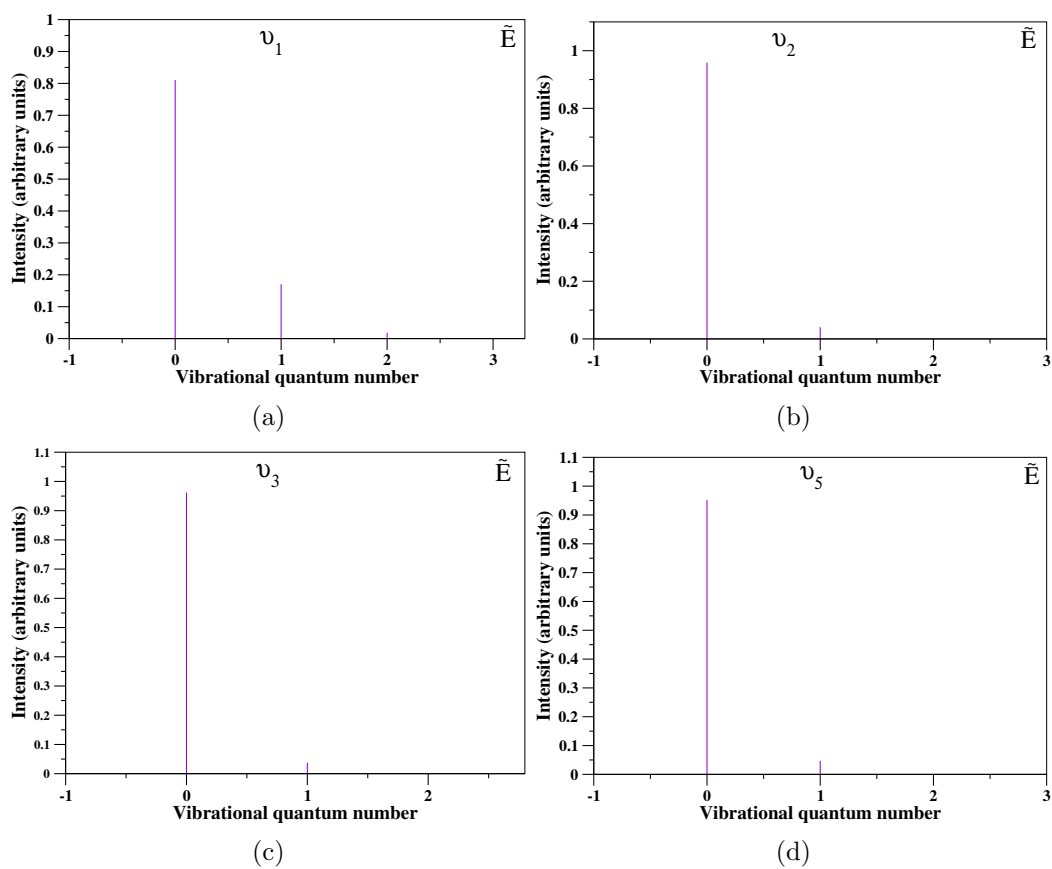

Figure S6. Poisson intensity distribution for totally symmetric modes concerning the  $\tilde{E}$  state of  $\text{LiB}_6$ .

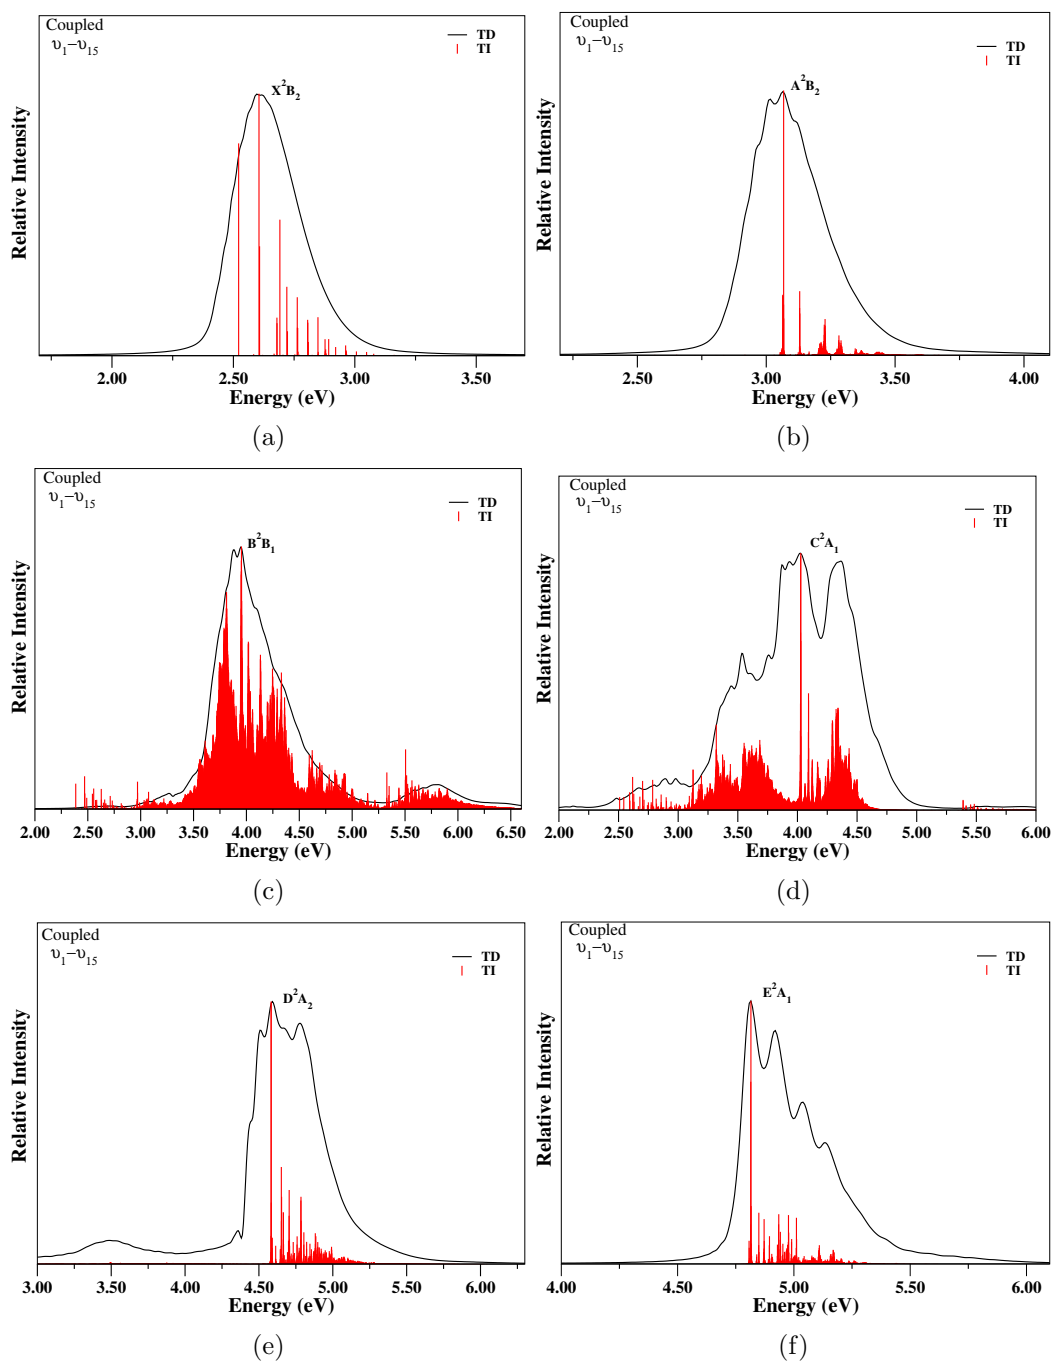

Figure S7. Comparison of theoretically calculated TD and TI coupled spectral peaks for  $\tilde{X}$ ,  $\tilde{A}$ ,  $\tilde{B}$ ,  $\tilde{C}$ ,  $\tilde{D}$  and  $\tilde{E}$  states of  $\text{LiB}_6$ . In this figure, the black curves and the red stick lines are estimated from the TD and TI methodologies, respectively.
